# Supplementary material
Source: PubMed Central journal article supplement (PMC3670755)
Supplement: NIHMS460833-supplement-1_si_001.pdf [file NIHMS460833-supplement-1_si_001.pdf]

**High affinity binding of an engineered, modular peptide to bone tissue**

Sabrina H. Brounts, Jae Sung Lee, Sean Weinberg, Sheeny K. Lan Levensgood, Everett L. Smith, William L. Murphy\*

**Table S1.** P values from Student's t-test between the amount of mBMP bound to cortical bone by incubating in peptide solution with various concentrations. The amount was quantified by measuring the change of incubating solution after peptide binding.

|          |                              | mBMP ( $\mu\text{g/mL}$ ) |         |         |       |   |   |
|----------|------------------------------|---------------------------|---------|---------|-------|---|---|
|          |                              | 300                       | 200     | 100     | 50    | 0 |   |
| 0.5 hour | mBMP<br>( $\mu\text{g/mL}$ ) | 300                       | -       | -       | -     | - | - |
|          |                              | 200                       | 0.009   | -       | -     | - | - |
|          |                              | 100                       | < 0.001 | < 0.001 | -     | - | - |
|          |                              | 50                        | < 0.001 | < 0.001 | 0.083 | - | - |
| 1 hour   | mBMP<br>( $\mu\text{g/mL}$ ) | 300                       | -       | -       | -     | - | - |
|          |                              | 200                       | 0.008   | -       | -     | - | - |
|          |                              | 100                       | < 0.001 | 0.008   | -     | - | - |
|          |                              | 50                        | < 0.001 | 0.003   | 0.030 | - | - |
| 2 hour   | mBMP<br>( $\mu\text{g/mL}$ ) | 300                       | -       | -       | -     | - | - |
|          |                              | 200                       | 0.008   | -       | -     | - | - |
|          |                              | 100                       | < 0.001 | 0.068   | -     | - | - |
|          |                              | 50                        | < 0.001 | 0.010   | 0.010 | - | - |
| 3 hour   | mBMP<br>( $\mu\text{g/mL}$ ) | 300                       | -       | -       | -     | - | - |
|          |                              | 200                       | 0.049   | -       | -     | - | - |
|          |                              | 100                       | < 0.001 | 0.091   | -     | - | - |
|          |                              | 50                        | < 0.001 | 0.022   | 0.001 | - | - |

**Table S2.** P values from Student's t-test between the fluorescence intensity of modular peptide bound to cortical bone by incubating in peptide solution with various concentrations.

|          |                               | mBMP ( $\mu\text{g/mL}$ ) |         |         |       |         | mBMP-mut ( $\mu\text{g/mL}$ ) |       |       |
|----------|-------------------------------|---------------------------|---------|---------|-------|---------|-------------------------------|-------|-------|
|          |                               | 300                       | 200     | 100     | 50    | 0       | 200                           | 100   |       |
| 0.5 hour | mBMP ( $\mu\text{g/mL}$ )     | 300                       | -       | -       | -     | -       | -                             | -     |       |
|          |                               | 200                       | 0.073   | -       | -     | -       | -                             | -     |       |
|          |                               | 100                       | 0.060   | 0.253   | -     | -       | -                             | -     |       |
|          |                               | 50                        | 0.003   | < 0.001 | 0.023 | -       | -                             | -     |       |
|          |                               | 0                         | 0.001   | < 0.001 | 0.006 | 0.001   | -                             | -     |       |
|          | Rhodamine                     | 50                        | 0.002   | < 0.001 | 0.014 | 0.087   | 0.019                         | 0.227 | 0.009 |
|          | mBMP-mut ( $\mu\text{g/mL}$ ) | 200                       | -       | 0.004   | -     | -       | -                             | -     | 0.020 |
|          |                               | 100                       | -       | -       | 0.005 | -       | -                             | -     |       |
| 1 hour   | mBMP ( $\mu\text{g/mL}$ )     | 300                       | -       | -       | -     | -       | -                             | -     |       |
|          |                               | 200                       | 0.682   | -       | -     | -       | -                             | -     |       |
|          |                               | 100                       | 0.046   | 0.003   | -     | -       | -                             | -     |       |
|          |                               | 50                        | 0.002   | < 0.001 | 0.262 | -       | -                             | -     |       |
|          |                               | 0                         | < 0.001 | < 0.001 | 0.009 | 0.003   | -                             | -     |       |
|          | Rhodamine                     | 50                        | < 0.001 | < 0.001 | 0.098 | 0.156   | 0.002                         | 0.688 | 0.709 |
|          | mBMP-mut ( $\mu\text{g/mL}$ ) | 200                       | -       | < 0.001 | -     | -       | -                             | -     | 0.572 |
|          |                               | 100                       | -       | -       | 0.106 | -       | -                             | -     |       |
| 2 hour   | mBMP ( $\mu\text{g/mL}$ )     | 300                       | -       | -       | -     | -       | -                             | -     |       |
|          |                               | 200                       | 0.072   | -       | -     | -       | -                             | -     |       |
|          |                               | 100                       | 0.011   | 0.089   | -     | -       | -                             | -     |       |
|          |                               | 50                        | < 0.001 | 0.004   | 0.163 | -       | -                             | -     |       |
|          |                               | 0                         | < 0.001 | < 0.001 | 0.005 | 0.001   | -                             | -     |       |
|          | Rhodamine                     | 50                        | < 0.001 | 0.004   | 0.125 | 0.687   | 0.002                         | 0.120 | 0.052 |
|          | mBMP-mut ( $\mu\text{g/mL}$ ) | 200                       | -       | < 0.001 | -     | -       | -                             | -     | 0.300 |
|          |                               | 100                       | -       | -       | 0.027 | -       | -                             | -     |       |
| 3 hour   | mBMP ( $\mu\text{g/mL}$ )     | 300                       | -       | -       | -     | -       | -                             | -     |       |
|          |                               | 200                       | 0.494   | -       | -     | -       | -                             | -     |       |
|          |                               | 100                       | 0.657   | 0.312   | -     | -       | -                             | -     |       |
|          |                               | 50                        | 0.002   | < 0.001 | 0.011 | -       | -                             | -     |       |
|          |                               | 0                         | < 0.001 | < 0.001 | 0.001 | < 0.001 | -                             | -     |       |
|          | Rhodamine                     | 50                        | 0.005   | 0.004   | 0.030 | 0.103   | 0.001                         | 0.504 | 0.551 |
|          | mBMP-mut ( $\mu\text{g/mL}$ ) | 200                       | -       | < 0.001 | -     | -       | -                             | -     | 0.533 |
|          |                               | 100                       | -       | -       | 0.008 | -       | -                             | -     |       |

**Table S3.** P values from Student's t-test between the fluorescence intensity of modular peptide bound to cortical bone by incubating in peptide solution for various time periods.

|                       |          | 1 hour | 2 hour | 3 hour  |
|-----------------------|----------|--------|--------|---------|
| mBMP<br>50 µg/mL      | 0.5 hour | 0.175  | 0.045  | < 0.001 |
|                       | 1 hour   | -      | 0.212  | 0.035   |
|                       | 2 hour   | -      | -      | 0.705   |
| mBMP<br>100 µg/mL     | 0.5 hour | 0.294  | 0.770  | 0.046   |
|                       | 1 hour   | -      | 0.253  | 0.019   |
|                       | 2 hour   | -      | -      | 0.081   |
| mBMP<br>200 µg/mL     | 0.5 hour | 0.014  | 0.027  | 0.002   |
|                       | 1 hour   | -      | 0.199  | 0.009   |
|                       | 2 hour   | -      | -      | 0.093   |
| mBMP<br>300 µg/mL     | 0.5 hour | 0.585  | 0.107  | 0.151   |
|                       | 1 hour   | -      | 0.029  | 0.159   |
|                       | 2 hour   | -      | -      | 0.424   |
| mBMP-mut<br>100 µg/mL | 0.5 hour | 0.044  | 0.043  | 0.090   |
|                       | 1 hour   | -      | 0.631  | 0.725   |
|                       | 2 hour   | -      | -      | 0.489   |
| mBMP-mut<br>200 µg/mL | 0.5 hour | 0.961  | 0.746  | 0.498   |
|                       | 1 hour   | -      | 0.775  | 0.462   |
|                       | 2 hour   | -      | -      | 0.325   |

**Table S4.** P values from Student's t-test between the fluorescence intensity of mBMP bound to trabecular bone by culturing in an *ex vivo* bone reactor circulating 100 µg/mL mBMP solution.

|         | 2 hour  | 4 hour  | 6 hour  | 8 hour  | 10 hour |
|---------|---------|---------|---------|---------|---------|
| 2 hour  | -       | -       | -       | -       | -       |
| 4 hour  | < 0.001 | -       | -       | -       | -       |
| 6 hour  | 0.013   | 0.528   | -       | -       | -       |
| 8 hour  | 0.002   | 0.303   | 0.112   | -       | -       |
| 10 hour | < 0.001 | 0.528   | 0.201   | 0.404   | -       |
| Control | < 0.001 | < 0.001 | < 0.001 | < 0.001 | < 0.001 |

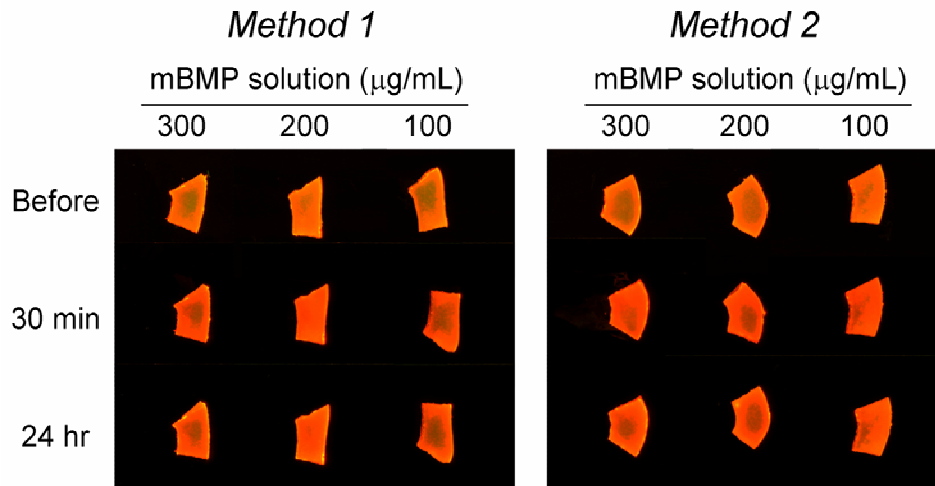

**Figure S1.** Fluorescence images of mBMP-bound cortical bone after treating with sodium hydroxide (NaOH) and sodium dodecyl sulfate (SDS). The peptide was bound to cortical bone by incubating in mBMP solution with various concentrations. The mBMP-bound bone was treated with 0.2 N NaOH solution for 7 min and neutralized with hydrochloric acid (HCl). The resulting bone piece was subsequently incubated in absence (method 1) or presence (method 2) of 1% SDS under mild rotation.
